# Supplementary material for: Association of Body Mass Index With Outcomes Among Patients With Head and Neck Cancer Treated With Chemoradiotherapy
Source: PubMed Central journal article supplement (PMC10300672; doi:10.1001/jamanetworkopen.2023.20513), 2023-06-27
Supplement: jamanetwopen-e2320513-s001.pdf [file jamanetwopen-e2320513-s001.pdf]

## Supplementary Online Content

Ma SJ, Khan M, Chatterjee U, et al. Association of body mass index with outcomes among patients with head and neck cancer treated with chemoradiotherapy. *JAMA Netw Open*. 2023;6(6):e2320513.  
doi:10.1001/jamanetworkopen.2023.20513

**eTable 1.** Cox Multivariable Analysis for Overall and Progression-Free Survival

**eTable 2.** Logistic Multivariable Analysis for Post-treatment Response

**eTable 3.** Fine-Gray Multivariable Analysis for Locoregional and Distant Failure

**eTable 4.** Cox and Fine-Gray Multivariable Analysis for Survival and Tumor Recurrence Outcomes Stratified by p16 Status

This supplementary material has been provided by the authors to give readers additional information about their work.

**eTable 1.** Cox Multivariable Analysis for Overall and Progression-Free Survival

|              | Overall survival |           |       | Progression-free survival |           |        |
|--------------|------------------|-----------|-------|---------------------------|-----------|--------|
|              | aHR              | 95% CI    | P     | aHR                       | 95% CI    | P      |
| BMI          |                  |           |       |                           |           |        |
| Normal       | Reference        |           |       | Reference                 |           |        |
| Overweight   | 0.59             | 0.39-0.91 | 0.02  | 0.51                      | 0.34-0.75 | <0.001 |
| Obese        | 0.62             | 0.39-0.98 | 0.04  | 0.66                      | 0.44-0.99 | 0.04   |
|              |                  |           |       |                           |           |        |
| Gender       |                  |           |       |                           |           |        |
| Male         | Reference        |           |       | Reference                 |           |        |
| Female       | 0.64             | 0.38-1.07 | 0.09  | 0.75                      | 0.48-1.17 | 0.2    |
|              |                  |           |       |                           |           |        |
| Smoker       |                  |           |       |                           |           |        |
| Never/Former | Reference        |           |       | Reference                 |           |        |
| Current      | 1.5              | 0.98-2.31 | 0.06  | 1.47                      | 1.00-2.18 | 0.05   |
|              |                  |           |       |                           |           |        |
| Age          |                  |           |       |                           |           |        |
| <65          | Reference        |           |       | Reference                 |           |        |
| 65 or older  | 1.71             | 1.16-2.52 | 0.007 | 1.58                      | 1.12-2.25 | 0.01   |
|              |                  |           |       |                           |           |        |
| KPS          |                  |           |       |                           |           |        |
| <90          | Reference        |           |       | Reference                 |           |        |
| 90-100       | 0.65             | 0.44-0.96 | 0.03  | 0.72                      | 0.51-1.03 | 0.08   |
|              |                  |           |       |                           |           |        |
| Race         |                  |           |       |                           |           |        |
| White        | Reference        |           |       | Reference                 |           |        |
| Other        | 1.22             | 0.73-2.04 | 0.45  | 0.88                      | 0.54-1.44 | 0.61   |
|              |                  |           |       |                           |           |        |
| Comorbidity  |                  |           |       |                           |           |        |
| 0            | Reference        |           |       | Reference                 |           |        |
| 1-3          | 0.62             | 0.36-1.04 | 0.07  | 0.61                      | 0.39-0.97 | 0.04   |
| >3           | 1.08             | 0.60-1.94 | 0.79  | 0.89                      | 0.53-1.50 | 0.66   |
|              |                  |           |       |                           |           |        |
| Site         |                  |           |       |                           |           |        |
| Oropharynx   | Reference        |           |       | Reference                 |           |        |
| Larynx       | 1.41             | 0.82-2.40 | 0.21  | 1.35                      | 0.82-2.20 | 0.23   |
| Other        | 1.19             | 0.71-1.99 | 0.5   | 1.19                      | 0.75-1.88 | 0.46   |
|              |                  |           |       |                           |           |        |

|               | Overall survival |           |        | Progression-free survival |            |        |
|---------------|------------------|-----------|--------|---------------------------|------------|--------|
|               | aHR              | 95% CI    | P      | aHR                       | 95% CI     | P      |
| T staging     |                  |           |        |                           |            |        |
| 1-2           | Reference        |           |        | Reference                 |            |        |
| 3-4           | 2.52             | 1.71-3.73 | <0.001 | 2.04                      | 1.45-2.88  | <0.001 |
|               |                  |           |        |                           |            |        |
| N staging     |                  |           |        |                           |            |        |
| 0             | Reference        |           |        | Reference                 |            |        |
| 1             | 1.84             | 0.91-3.72 | 0.09   | 1.49                      | 0.78-2.87  | 0.23   |
| 2             | 1.97             | 1.13-3.45 | 0.02   | 1.8                       | 1.08-3.01  | 0.03   |
| 3             | 4.24             | 2.06-8.74 | <0.001 | 5.71                      | 3.07-10.63 | <0.001 |
|               |                  |           |        |                           |            |        |
| HPV           |                  |           |        |                           |            |        |
| Negative      | Reference        |           |        | Reference                 |            |        |
| Positive      | 0.75             | 0.44-1.28 | 0.29   | 0.76                      | 0.47-1.23  | 0.26   |
| Not available | 0.87             | 0.55-1.36 | 0.54   | 0.79                      | 0.52-1.20  | 0.26   |
|               |                  |           |        |                           |            |        |
| Chemotherapy  |                  |           |        |                           |            |        |
| Cisplatin     | Reference        |           |        | Reference                 |            |        |
| Other         | 1.69             | 1.04-2.74 | 0.03   | 1.84                      | 1.21-2.80  | 0.005  |

aHR: adjusted hazards ratio; CI: confidence interval; BMI: body mass index; KPS: Karnofsky performance status; HPV: human papillomavirus

**eTable 2.** Logistic Multivariable Analysis for Post-treatment Response

|              | aOR       | 95% CI    | P      |
|--------------|-----------|-----------|--------|
| BMI          |           |           |        |
| Normal       | Reference |           |        |
| Overweight   | 0.86      | 0.80-0.93 | <0.001 |
| Obese        | 0.89      | 0.81-0.96 | 0.005  |
|              |           |           |        |
| Gender       |           |           |        |
| Male         | Reference |           |        |
| Female       | 0.96      | 0.88-1.04 | 0.33   |
|              |           |           |        |
| Smoker       |           |           |        |
| Never/Former | Reference |           |        |
| Current      | 0.97      | 0.89-1.05 | 0.4    |
|              |           |           |        |
| Age          |           |           |        |
| <65          | Reference |           |        |
| 65 or older  | 0.94      | 0.88-1.01 | 0.1    |
|              |           |           |        |
| KPS          |           |           |        |
| <90          | Reference |           |        |
| 90-100       | 0.89      | 0.83-0.96 | 0.002  |
|              |           |           |        |
| Race         |           |           |        |
| White        | Reference |           |        |
| Other        | 1.02      | 0.93-1.11 | 0.74   |
|              |           |           |        |
| Comorbidity  |           |           |        |
| 0            | Reference |           |        |
| 1-3          | 0.92      | 0.84-1.00 | 0.05   |
| >3           | 0.92      | 0.83-1.02 | 0.12   |

|               | aOR       | 95% CI    | P      |
|---------------|-----------|-----------|--------|
| Site          |           |           |        |
| Oropharynx    | Reference |           |        |
| Larynx        | 1.04      | 0.94-1.15 | 0.45   |
| Other         | 1.05      | 0.97-1.15 | 0.24   |
|               |           |           |        |
| T staging     |           |           |        |
| 1-2           | Reference |           |        |
| 3-4           | 1.12      | 1.04-1.19 | 0.001  |
|               |           |           |        |
| N staging     |           |           |        |
| 0             | Reference |           |        |
| 1             | 1.05      | 0.93-1.19 | 0.43   |
| 2             | 1.14      | 1.03-1.26 | 0.009  |
| 3             | 1.28      | 1.12-1.47 | <0.001 |
|               |           |           |        |
| HPV           |           |           |        |
| Negative      | Reference |           |        |
| Positive      | 0.9       | 0.82-0.99 | 0.04   |
| Not available | 0.94      | 0.86-1.02 | 0.14   |
|               |           |           |        |
| Chemotherapy  |           |           |        |
| Cisplatin     | Reference |           |        |
| Other         | 1.23      | 1.13-1.35 | <0.001 |

aOR: adjusted odds ratio; CI: confidence interval; BMI: body mass index; KPS: Karnofsky performance status; HPV: human papillomavirus

**eTable 3.** Fine-Gray Multivariable Analysis for Locoregional and Distant Failure

|              | Locoregional failure |           |      | Distant failure |           |      |
|--------------|----------------------|-----------|------|-----------------|-----------|------|
|              | aHR                  | 95% CI    | P    | aHR             | 95% CI    | P    |
| BMI          |                      |           |      |                 |           |      |
| Normal       | Reference            |           |      | Reference       |           |      |
| Overweight   | 0.3                  | 0.12-0.71 | 0.01 | 0.92            | 0.47-1.77 | 0.79 |
| Obese        | 0.63                 | 0.29-1.37 | 0.24 | 0.7             | 0.35-1.38 | 0.3  |
|              |                      |           |      |                 |           |      |
| Gender       |                      |           |      |                 |           |      |
| Male         | Reference            |           |      | Reference       |           |      |
| Female       | 0.81                 | 0.35-1.86 | 0.61 | 0.81            | 0.40-1.64 | 0.56 |
|              |                      |           |      |                 |           |      |
| Smoker       |                      |           |      |                 |           |      |
| Never/Former | Reference            |           |      | Reference       |           |      |
| Current      | 1.28                 | 0.63-2.62 | 0.5  | 1.12            | 0.58-2.13 | 0.74 |
|              |                      |           |      |                 |           |      |
| Age          |                      |           |      |                 |           |      |
| <65          | Reference            |           |      | Reference       |           |      |
| 65 or older  | 1.45                 | 0.72-2.93 | 0.3  | 0.91            | 0.53-1.59 | 0.75 |
|              |                      |           |      |                 |           |      |
| KPS          |                      |           |      |                 |           |      |
| <90          | Reference            |           |      | Reference       |           |      |
| 90-100       | 0.86                 | 0.44-1.66 | 0.64 | 0.71            | 0.39-1.29 | 0.26 |
|              |                      |           |      |                 |           |      |
| Race         |                      |           |      |                 |           |      |
| White        | Reference            |           |      | Reference       |           |      |
| Other        | 1.22                 | 0.47-3.17 | 0.68 | 0.7             | 0.29-1.73 | 0.44 |
|              |                      |           |      |                 |           |      |
| Comorbidity  |                      |           |      |                 |           |      |
| 0            | Reference            |           |      | Reference       |           |      |
| 1-3          | 0.69                 | 0.31-1.51 | 0.35 | 0.8             | 0.36-1.78 | 0.59 |
| >3           | 0.45                 | 0.15-1.39 | 0.16 | 1.05            | 0.44-2.51 | 0.91 |
|              |                      |           |      |                 |           |      |
| Site         |                      |           |      |                 |           |      |
| Oropharynx   | Reference            |           |      | Reference       |           |      |
| Larynx       | 2.04                 | 0.65-6.46 | 0.23 | 1.52            | 0.72-3.21 | 0.28 |
| Other        | 1.85                 | 0.73-4.67 | 0.2  | 1.26            | 0.66-2.43 | 0.49 |
|              |                      |           |      |                 |           |      |

|               | Locoregional failure |            |      | Distant failure |            |        |
|---------------|----------------------|------------|------|-----------------|------------|--------|
|               | aHR                  | 95% CI     | P    | aHR             | 95% CI     | P      |
| T staging     |                      |            |      |                 |            |        |
| 1-2           | Reference            |            |      | Reference       |            |        |
| 3-4           | 2.4                  | 1.24-4.66  | 0.01 | 2.38            | 1.36-4.15  | 0.002  |
|               |                      |            |      |                 |            |        |
| N staging     |                      |            |      |                 |            |        |
| 0             | Reference            |            |      | Reference       |            |        |
| 1             | 0.83                 | 0.24-2.81  | 0.76 | 2.08            | 0.53-8.08  | 0.29   |
| 2             | 0.9                  | 0.33-2.45  | 0.84 | 5.19            | 1.86-14.47 | 0.002  |
| 3             | 3.86                 | 1.16-12.87 | 0.03 | 11.16           | 3.45-36.16 | <0.001 |
|               |                      |            |      |                 |            |        |
| HPV           |                      |            |      |                 |            |        |
| Negative      | Reference            |            |      | Reference       |            |        |
| Positive      | 1.01                 | 0.30-3.39  | 0.99 | 1.1             | 0.51-2.35  | 0.81   |
| Not available | 1.08                 | 0.48-2.45  | 0.85 | 0.84            | 0.37-1.88  | 0.67   |
|               |                      |            |      |                 |            |        |
| Chemotherapy  |                      |            |      |                 |            |        |
| Cisplatin     | Reference            |            |      | Reference       |            |        |
| Other         | 1.03                 | 0.42-2.51  | 0.95 | 1.94            | 0.99-3.80  | 0.05   |

aHR: adjusted hazards ratio; CI: confidence interval; BMI: body mass index; KPS: Karnofsky performance status; HPV: human papillomavirus

**eTable 4.** Cox and Fine-Gray Multivariable Analysis for Survival and Tumor Recurrence Outcomes Stratified by p16 Status

| p16-negative cohort |                  |           |      |                           |           |      |                      |            |       |                 |            |      |
|---------------------|------------------|-----------|------|---------------------------|-----------|------|----------------------|------------|-------|-----------------|------------|------|
|                     | Overall survival |           |      | Progression-free survival |           |      | Locoregional failure |            |       | Distant failure |            |      |
|                     | aHR              | 95% CI    | P    | aHR                       | 95% CI    | P    | aHR                  | 95% CI     | P     | aHR             | 95% CI     | P    |
| BMI                 |                  |           |      |                           |           |      |                      |            |       |                 |            |      |
| Normal              | Reference        |           |      | Reference                 |           |      | Reference            |            |       | Reference       |            |      |
| Overweight          | 1.49             | 0.48-4.64 | 0.5  | 0.65                      | 0.21-1.96 | 0.44 | 0.33                 | 0.01-9.51  | 0.52  | 7.13            | 0.54-94.5  | 0.14 |
| Obese               | 1.98             | 0.61-6.44 | 0.26 | 0.65                      | 0.21-2.01 | 0.45 | 0.95                 | 0.03-33.8  | 0.98  | 0.05            | 0.004-0.80 | 0.03 |
|                     |                  |           |      |                           |           |      |                      |            |       |                 |            |      |
| p16-positive cohort |                  |           |      |                           |           |      |                      |            |       |                 |            |      |
|                     | Overall survival |           |      | Progression-free survival |           |      | Locoregional failure |            |       | Distant failure |            |      |
|                     | aHR              | 95% CI    | P    | aHR                       | 95% CI    | P    | aHR                  | 95% CI     | P     | aHR             | 95% CI     | P    |
| BMI                 |                  |           |      |                           |           |      |                      |            |       |                 |            |      |
| Normal              | Reference        |           |      | Reference                 |           |      | Reference            |            |       | Reference       |            |      |
| Overweight          | 0.91             | 0.43-1.93 | 0.81 | 0.54                      | 0.27-1.06 | 0.07 | 0.02                 | 0.001-0.29 | 0.005 | 0.56            | 0.24-1.34  | 0.19 |
| Obese               | 0.72             | 0.30-1.69 | 0.45 | 0.6                       | 0.30-1.22 | 0.16 | 0.32                 | 0.08-1.19  | 0.09  | 0.4             | 0.16-1.01  | 0.05 |

aHR: adjusted hazards ratio; CI: confidence interval; BMI: body mass index
