# Supplementary material for: Association of Body Mass Index With Outcomes Among Patients With Head and Neck Cancer Treated With Chemoradiotherapy
Source: PubMed Central journal article supplement (PMC10300672; doi:10.1001/jamanetworkopen.2023.20513), 2023-06-27
Supplement: jamanetwopen-e2320513-s002.pdf [file jamanetwopen-e2320513-s002.pdf]

## Data Sharing Statement

Ma. Association of Body Mass Index With Outcomes Among Patients With Head and Neck Cancer Treated With Chemoradiotherapy. *JAMA Netw Open*. Published June 27, 2023. doi:10.1001/jamanetworkopen.2023.20513

### Data

**Data available:** No

### Additional Information

**Explanation for why data not available:** The data underlying this article cannot be shared publicly for the privacy of individuals that participated in the study. The data are available from the corresponding author upon reasonable request.
